# Supplementary material
Source: Springer Nature journal article supplement (https://www.springermedizin.de/resource/supplementary/13005_2014_340_MOESM6_ESM.pdf/9625984)
Supplement: MOESM6 [file 9625984]

Detection rate of septa in the maxillary sinus on panoramic radiographs

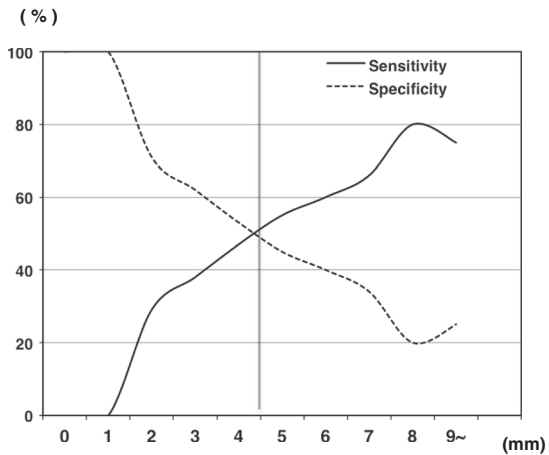

Height of septa in the maxillary sinus
